# Supplementary material for: Transcriptome analysis and exploration of genes involved in the biosynthesis of secoiridoids in Gentiana rhodantha
Source: PeerJ. 2023 Mar 8;11:e14968. doi: 10.7717/peerj.14968 (PMC10007974; doi:10.7717/peerj.14968)
Supplement: Supplemental Information 1 [file peerj-11-14968-s001.xlsx]

## Sheet: Sheet1
swertiamarin（y=6700.2x-80.281)
tissue	peak area	Sample weight（g）	Constant volume（ml）	X	content(mg/g)	content（%）
Root 1	267.151	2.5	15	0.0518539	0.311124	0.0311124
Root 2	268.536	2.5	15	0.0520608	0.312365	0.0312365
Root 3	278.483	2.5	15	0.0535453	0.321272	0.0321272
Stem 1	284.5	2.5	15	0.0544433	0.32666	0.032666
Stem 2	290.359	2.5	15	0.0553177	0.331906	0.0331906
Stem 3	288.341	2.5	15	0.0550166	0.3301	0.03301
Leaf 1	318.442	2.5	15	0.0595091	0.357055	0.0357055
Leaf 2	319.75	2.5	15	0.0597044	0.358226	0.0358226
Leaf 3	329.056	2.5	15	0.0610932	0.366559	0.0366559
Flower 1	681.812	2.5	15	0.113742	0.682451	0.0682451
Flower 2	652.739	2.5	15	0.109403	0.656416	0.0656416
Flower 3	684.858	2.5	15	0.114196	0.685178	0.0685178
mangiferin（y=14322x＋357.26)
tissue	peak area	Sample weight（g）	Constant volume（ml）	X	content（mg/g）	content（%）
Root 1	2788.71	2.5	15	0.16977	1.01862	0.101862
Root 2	2809.32	2.5	15	0.171209	1.02726	0.102726
Root 3	2772.83	2.5	15	0.168662	1.01197	0.101197
Stem 1	4814.71	2.5	15	0.311231	1.86739	0.186739
Stem 2	4873.09	2.5	15	0.315307	1.89184	0.189184
Stem 3	4845.44	2.5	15	0.313376	1.88026	0.188026
Leaf 1	10234.7	2.5	15	0.689669	4.13801	0.413801
Leaf 2	10150.7	2.5	15	0.683804	4.10282	0.410282
Leaf 3	10168.7	2.5	15	0.685061	4.11036	0.411036
Flower 1	4567.16	2.5	15	0.293946	1.76368	0.176368
Flower 2	4431.16	2.5	15	0.284451	1.7067	0.17067
Flower 3	4437.19	2.5	15	0.284871	1.70923	0.170923
loganin acid（y=8237.1x-65.961)
tissue	peak area	Sample weight（g）	Constant volume（ml）	X	content（mg/g）	content（%）
Root 1	163.364	2.5	15	0.0278406	0.167043	0.0167043
Root 2	163.434	2.5	15	0.027849	0.167094	0.0167094
Root 3	150.692	2.5	15	0.0263021	0.157812	0.0157812
Stem 1	628.875	2.5	15	0.0843544	0.506126	0.0506126
Stem 2	629.586	2.5	15	0.0844407	0.506644	0.0506644
Stem 3	633.679	2.5	15	0.0849376	0.509626	0.0509626
Leaf 1	986.597	2.5	15	0.127783	0.766696	0.0766696
Leaf 2	1080.74	2.5	15	0.139212	0.835273	0.0835273
Leaf 3	1068.07	2.5	15	0.137673	0.826039	0.0826039
Flower 1	636.003	2.5	15	0.0852198	0.511319	0.0511319
Flower 2	651.171	2.5	15	0.0870612	0.522367	0.0522367
Flower 3	626.752	2.5	15	0.0840968	0.504581	0.0504581

## Sheet: Sheet2
loganin acid	Concentration	peak area
	0.5	4075.02
	0.125	878.561
	0.0625	421.999
	0.03125	195.969
	0.015625	101.533
	0.0078125	44.6421
mangiferin	Concentration	peak area
	2	28988.1
	1	14639
	0.5	7676.02
	0.25	3946.8
	0.125	2034.44
swertiamarin	Concentration	peak area
	0.5	3284.48
	0.125	697.867
	0.0625	318.314
	0.03125	150.617
	0.015625	67.7716
