# Supplementary material for: Transcriptome analysis and exploration of genes involved in the biosynthesis of secoiridoids in Gentiana rhodantha
Source: PeerJ. 2023 Mar 8;11:e14968. doi: 10.7717/peerj.14968 (PMC10007974; doi:10.7717/peerj.14968)
Supplement: Supplemental Information 2 [file peerj-11-14968-s002.xlsx]

## Sheet: 8HGO
18S	Sample name	Ct average	Ct standard deviation	8HGO	Sample name	Ct average	Ct standard deviation
	R4	10.51	0.22		R4	24.64	0.18
	R2	11.45	0.05		R2	23.86	0.48
	R3	10.19	0.12		R3	22.88	0.43
	S4	10.54	0.15		S4	22.12	0.09
	S2	10.48	0.1		S2	22.12	0.28
	S3	10.23	0.11		S3	21.43	0.17
	L3	10.62	0.11		L3	21.03	0.21
	f4	10.27	0.08		f4	20.39	0.27
	f2	10.21	0.1		f2	20.65	0.2
	f3	9.51	0.07		f3	20.34	0.18
	L1	10.23	0.07		L1	20.2	0.04
	L2-2	9.65	0.18		L2-2	20.12	0.06
(Vandesempele,2001)	Endogenous reference genes		Gene of interest		Endogenous reference genes		Gene of interest		Relative to the expression of the reference sample		Note: The reference sample can be filled with the Cq value of any one sample, and the final result is expressed as the relative expression relative to the reference sample. The expression of the reference sample itself is 1.
	18S		8HGO
Amplification efficiency	1		1
Sample name	Cq average	Cq SD	Cq average	Cq SD	RQ	RQ CV	RQ	RQ CV	Expression	Expression SD
R4	10.51	0.22	24.64	0.18	1	0.152492	1	0.124766	1	0.197029
R2	11.45	0.05	23.86	0.48	0.521233	0.0346574	1.71713	0.332711	3.29436	1.102
R3	10.19	0.12	22.88	0.43	1.24833	0.0831777	3.38698	0.298053	2.71321	0.83958
S4	10.54	0.15	22.12	0.09	0.97942	0.103972	5.73582	0.0623832	5.85634	0.710089
S2	10.48	0.1	22.12	0.28	1.02101	0.0693147	5.73582	0.194081	5.61778	1.15775
S3	10.23	0.11	21.43	0.17	1.21419	0.0762462	9.25351	0.117835	7.6211	1.06963
L3	10.62	0.11	21.03	0.21	0.926588	0.0762462	12.2101	0.145561	13.1775	2.16534
f4	10.27	0.08	20.39	0.27	1.18099	0.0554518	19.0273	0.18715	16.1113	3.14479
f2	10.21	0.1	20.65	0.2	1.23114	0.0693147	15.8895	0.138629	12.9063	2.00037
f3	9.51	0.07	20.34	0.18	2	0.0485203	19.6983	0.124766	9.84916	1.3185
L1	10.23	0.07	20.2	0.04	1.21419	0.0485203	21.7057	0.0277259	17.8766	0.999003
L2-2	9.65	0.18	20.12	0.06	1.81504	0.124766	22.9433	0.0415888	12.6407	1.66244
Root	2.33586
Stem	6.36508
Leaf	14.5649
Flower	12.9556
SD	standard deviation
RQ	Relative quantity
RQ CV	SD/RQ
CT value	The number of cycles at the time the fluorescence signal is detected
Cq value	The average of 3 complex well CT values
